# Supplementary material for: Neuroinflammation-Associated Aspecific Manipulation of Mouse Predator Fear by Toxoplasma gondii
Source: PubMed Central journal article supplement (PMC6963786; doi:10.1016/j.celrep.2019.12.019), 2020-01-14
Supplement: mmc1.pdf [file mmc1.pdf]

Cell Reports, Volume 30

## Supplemental Information

**Neuroinflammation-Associated**

**Aspecific Manipulation of Mouse**

**Predator Fear by *Toxoplasma gondii***

**Madlaina Boillat, Pierre-Mehdi Hammoudi, Sunil Kumar Dogga, Stéphane Pagès, Maged Goubran, Ivan Rodriguez, and Dominique Soldati-Favre**

**A**

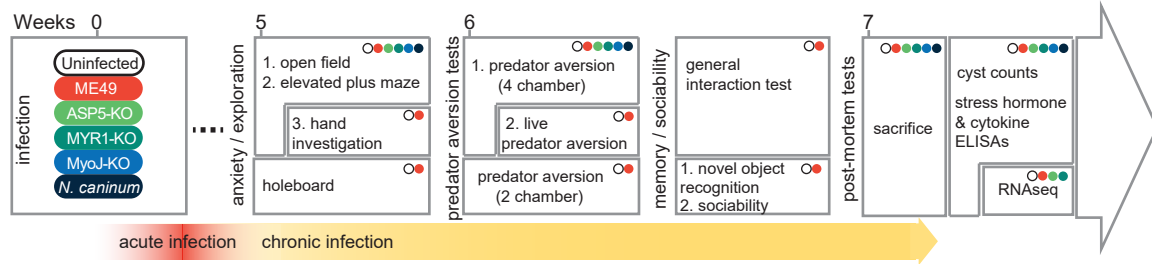

**B**

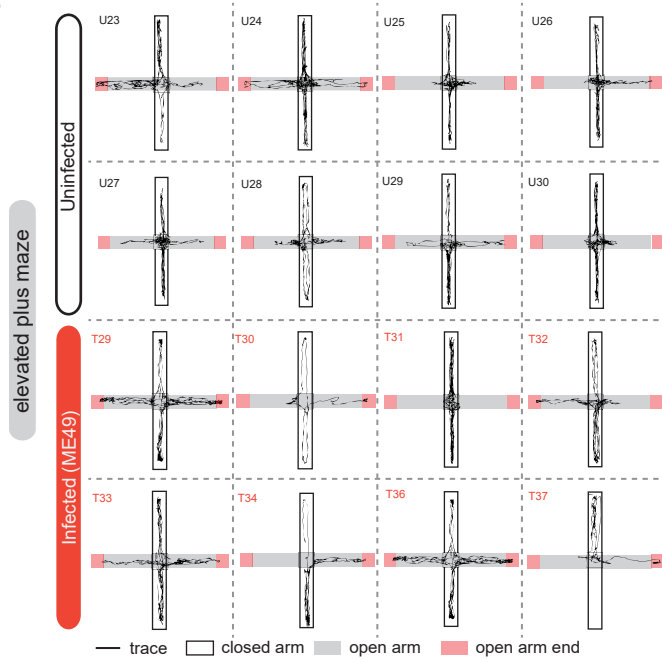

**C**

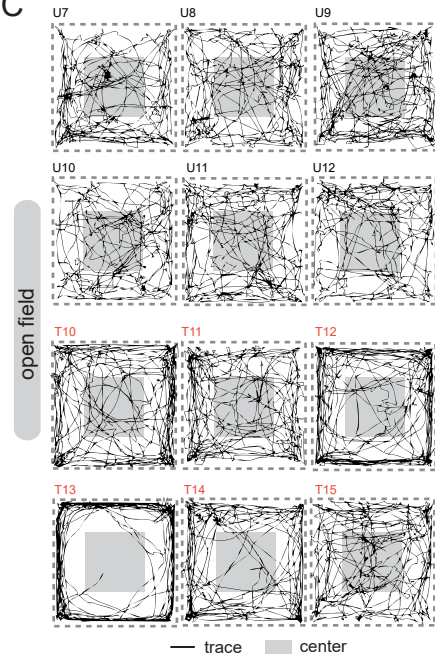

**D**

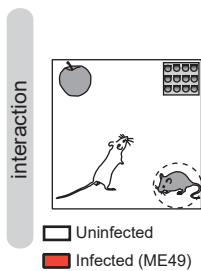

**E**

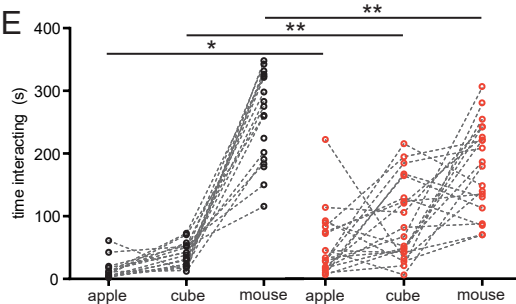

**F**

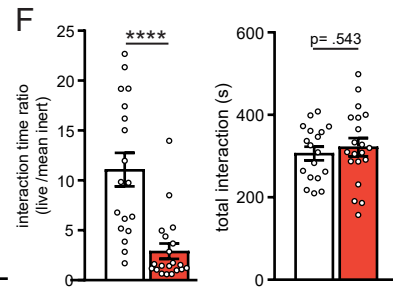

**G**

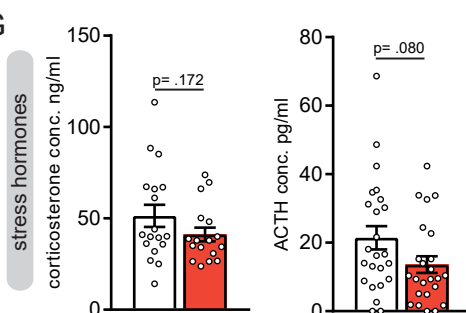

**H**

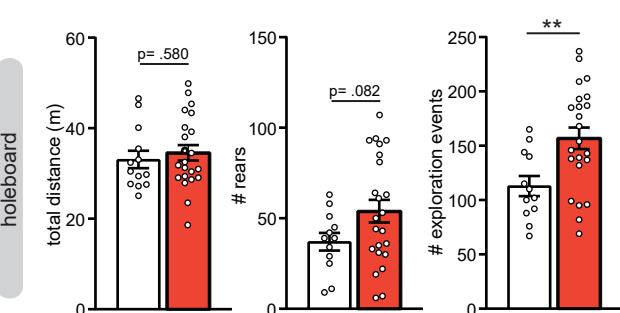

**Figure S1 - *T. gondii* infection leads to decreased anxiety and increased exploration behaviors, Related to Figure 1**

(A) Schematic of workflow and time course of infection. Dots in upper right corners describe which groups of mice were analyzed or performed the corresponding test. Precise details of experimental groups and all results can be found in Table S2.

(B) and (C) Representative traces from mice in the elevated plus maze and open field respectively. Numbers represent mice IDs. Traces only represent trajectory but not time spent in specific areas.

(D) Schematic of the general interaction test.

(E) Quantification of interaction times with each stimulus and (F) ratio of time spent interacting with the live stimulus (mouse) / mean inert stimuli (apple + cube).

(G) Basal corticosterone plasma levels (uninfected n=17, infected (ME49) n=18) and basal adrenocorticotrophic hormone (ACTH) plasma levels (uninfected n=24, infected (ME49) n=24) of mice at 7 weeks post-infection.

(H) Quantification of behaviors during the holeboard test. Exploration events comprise head dips and rears.

Bars indicate mean  $\pm$  SEM and each dot represents an individual. For details of the statistical analyses, see Table S1.

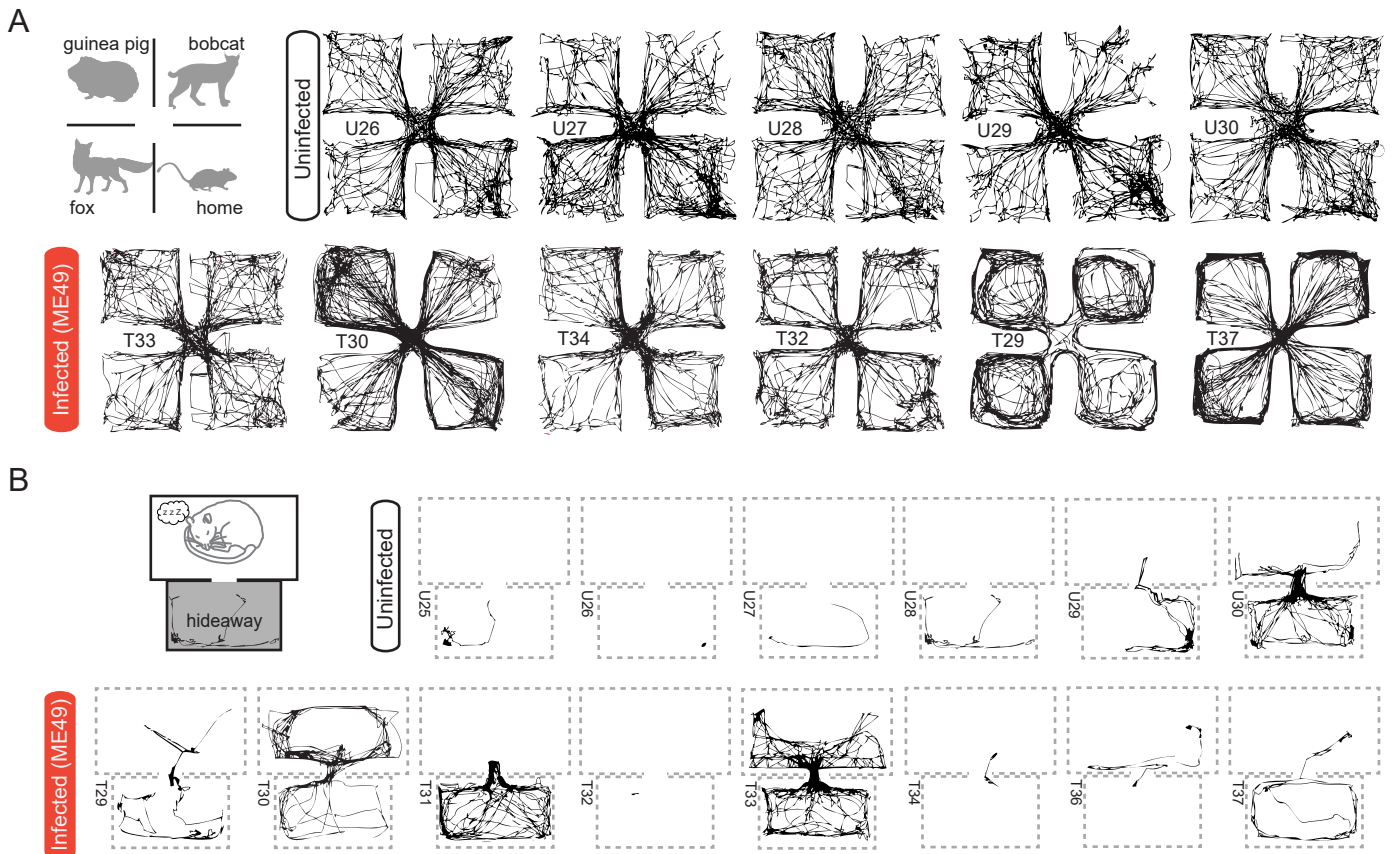

**Figure S2 – Non-specific loss of predator aversion in *T. gondii* infected mice, Related to Figure 2**

(A) Representative traces from uninfected and *T. gondii* ME49-infected mice in the 4-chamber predator aversion assay. Numbers indicate mice IDs.

(B) Representative traces from uninfected and *T. gondii* ME49-infected mice in the live predator aversion assay.



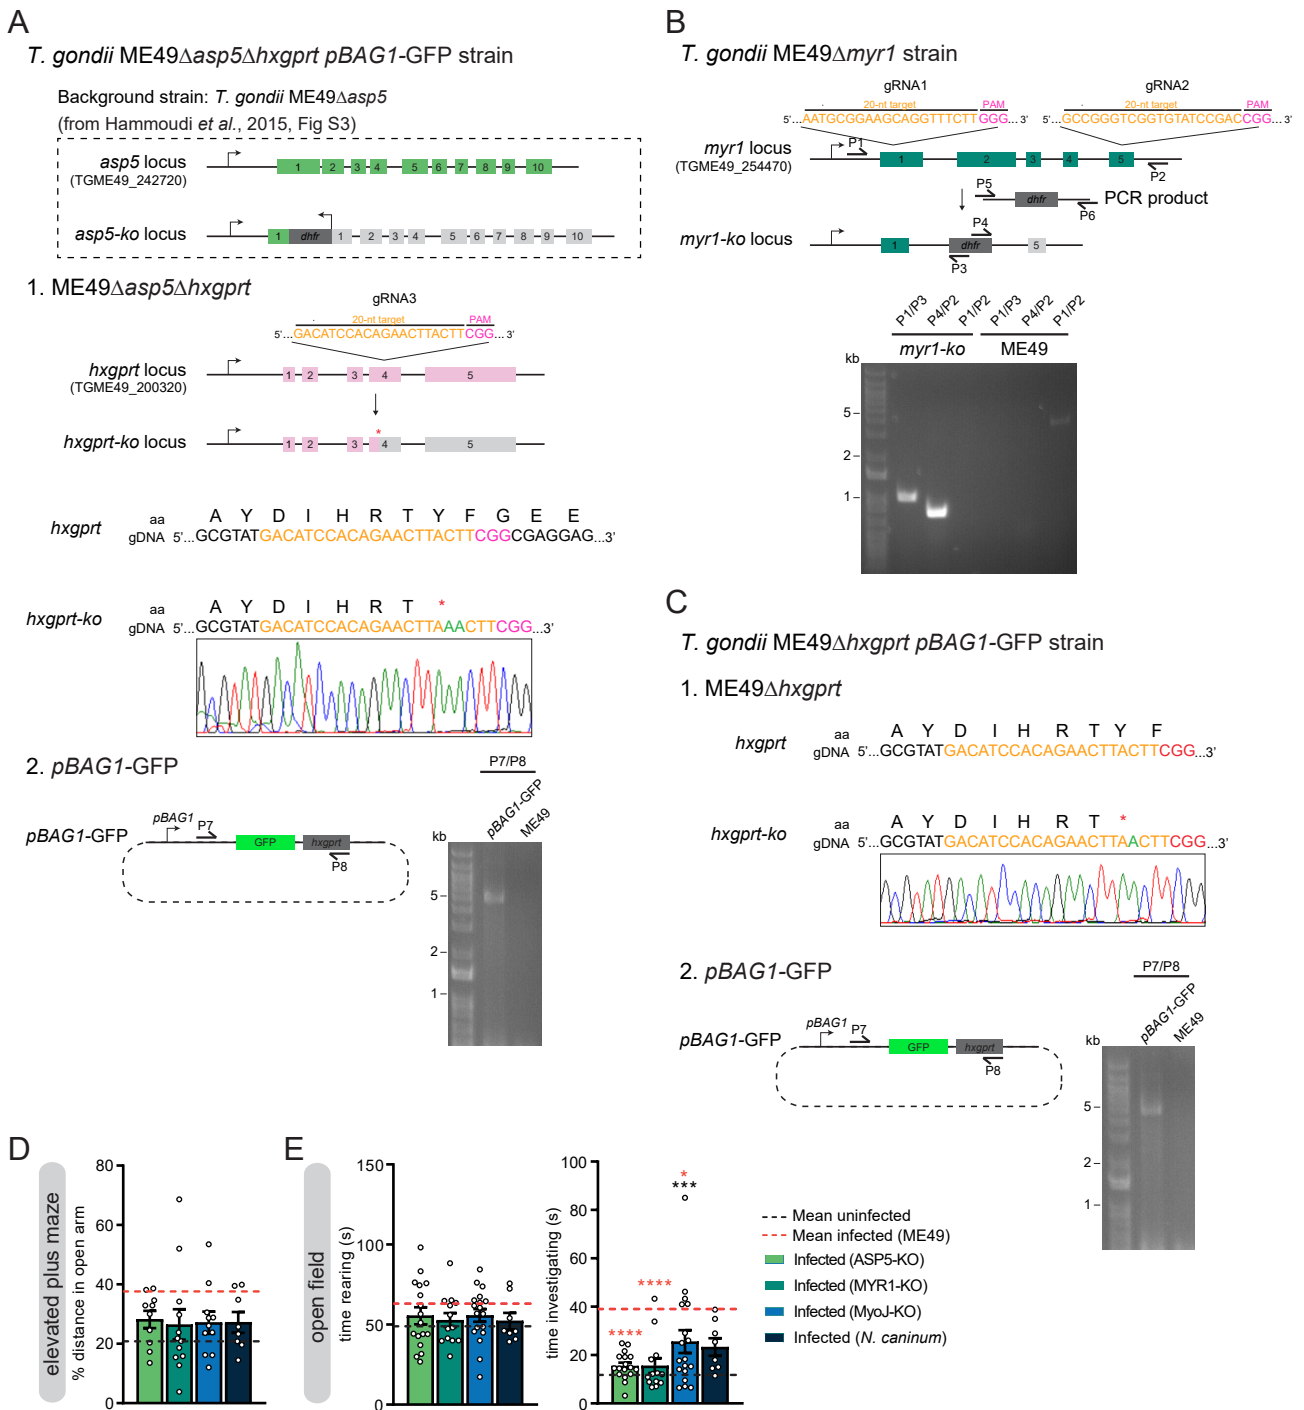

**Figure S3 - Severity of behavioral changes induced by *T. gondii* infection correlates with cyst load, Related to Figure 3**

(A), (B) and (C) Schematic representation of the strategy used to generate transgenic strains used in this study and PCR or sequencing analysis to verify correct integration or locus disruption.

(D) Quantification of percentage of distance travelled in the open arm of an elevated plus maze of mice infected with *T. gondii* parasites deficient for protein export (ASP5-KO, MYR1-KO), with a low virulence strain (MyoJ-KO) or with a different apicomplexan parasite (*N. caninum*).

(E) Quantification of rearing and investigation in the open field.

Bars indicate mean  $\pm$  SEM and each dot represents an individual. \* $p < 0.05$ , \*\* $p < 0.01$ , \*\*\* $p < 0.001$ , \*\*\*\* $p < 0.0001$ , black asterisks represent significant differences compared to uninfected mice and orange asterisks represent significant differences compared to ME49-infected mice.

### Supplementary Table 4, related to Figure 3

#### Primers used in this study

|           |         |                                                                       |
|-----------|---------|-----------------------------------------------------------------------|
| P1        | (5'-3') | cgctgagcagaaagcatagca                                                 |
| P2        | (5'-3') | cgacgtcaggttcatacaagc                                                 |
| P3        | (5'-3') | gtcacttggtgtgccagttctac                                               |
| P4        | (5'-3') | cttgggggtcatcgcgacgaccagac                                            |
| P5        | (5'-3') | caaggactccgaatccgacgagtcactgaagcggccgctctagaactag                     |
| P6        | (5'-3') | cacggtgagacgatgttccatcgttctgtggcgggaagatccgatcttgc                    |
| P7        | (5'-3') | gccggtaccgcgactttatccagttgcccg                                        |
| P8        | (5'-3') | gcgactagtgcggaagatccgatcttgc                                          |
| gRNA1     | (5'-3') | <b>G A A T G C G G A A G C A G G T T T C T T</b> gttttagagctagaaatagc |
| gRNA2     | (5'-3') | <b>G C C G G G T C G G T G T A T C C G A C</b> gttttagagctagaaatagc   |
| gRNA3     | (5'-3') | <b>G A C A T C C A C A G A A C T T A C T T</b> gttttagagctagaaatagc   |
| gRNA-4883 | (5'-3') | aacttgacatccccatttac                                                  |



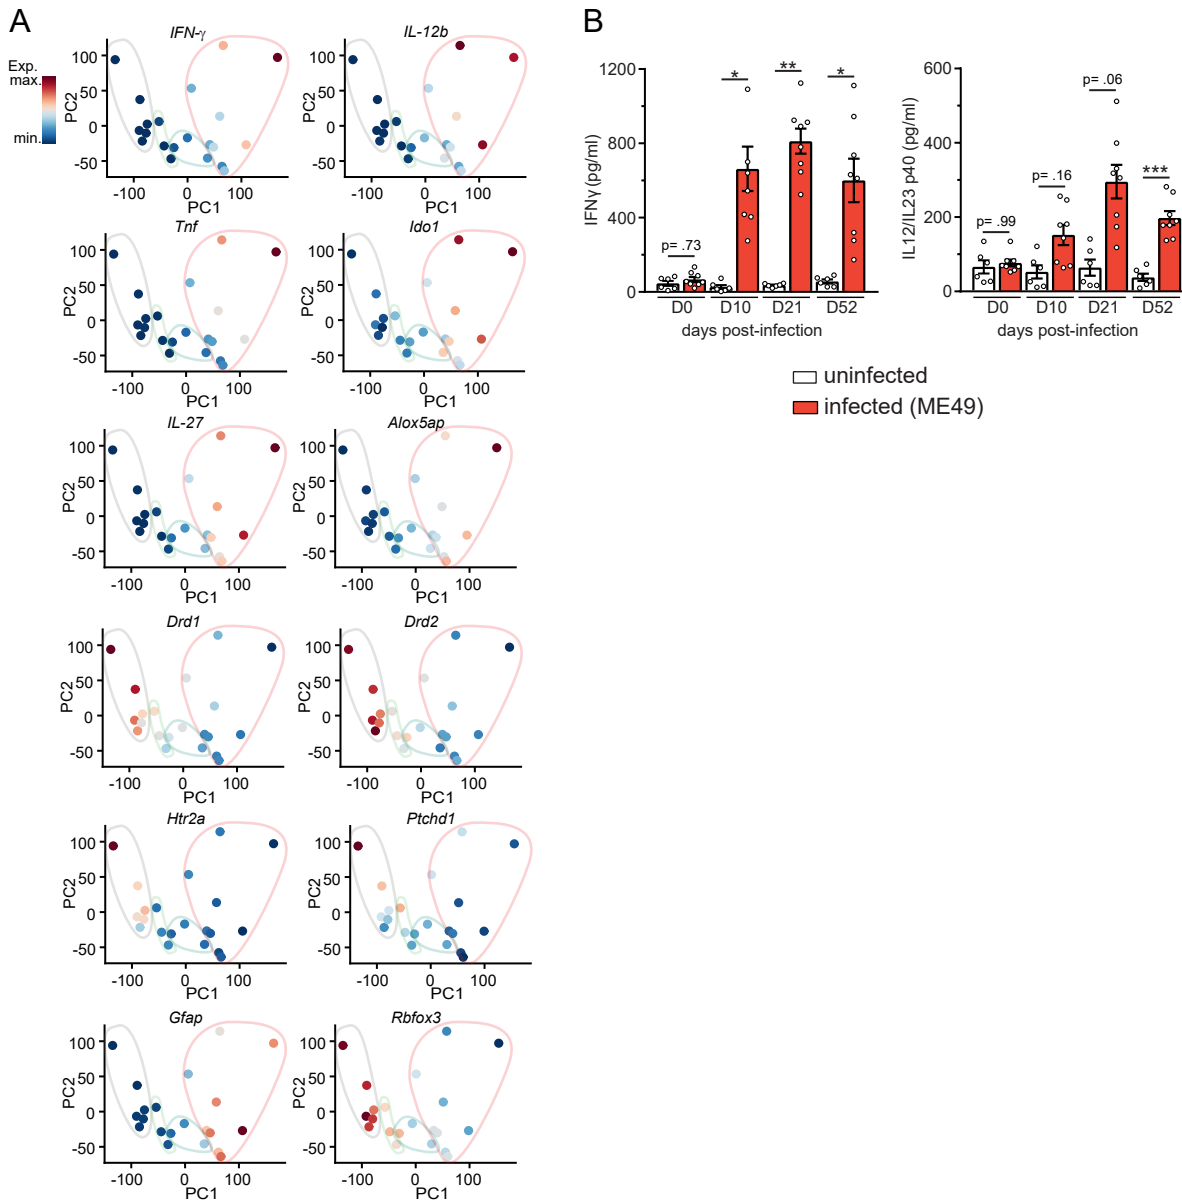

**Figure S5 – Association of gene expression levels with infection and behavior, Related to Figure 5**  
 (A) Relative gene expression levels representative of the up- and down-regulated pathways, displayed on a 2D PCA generated with all gene expression values (same as in Figure 4A). Ovals surround uninfected mice (grey) and mice infected with a parasite strain of the same genotype (colors).  
 (B) Concentration of IFN- $\gamma$  and IL-12/IL-23 p40 in the plasma at 0, 10, 21 and 52 days postinfection in ME49-infected mice.  
 Bars indicate mean  $\pm$  SEM and each dot represents an individual. \* $p < 0.05$ , \*\* $p < 0.01$ .

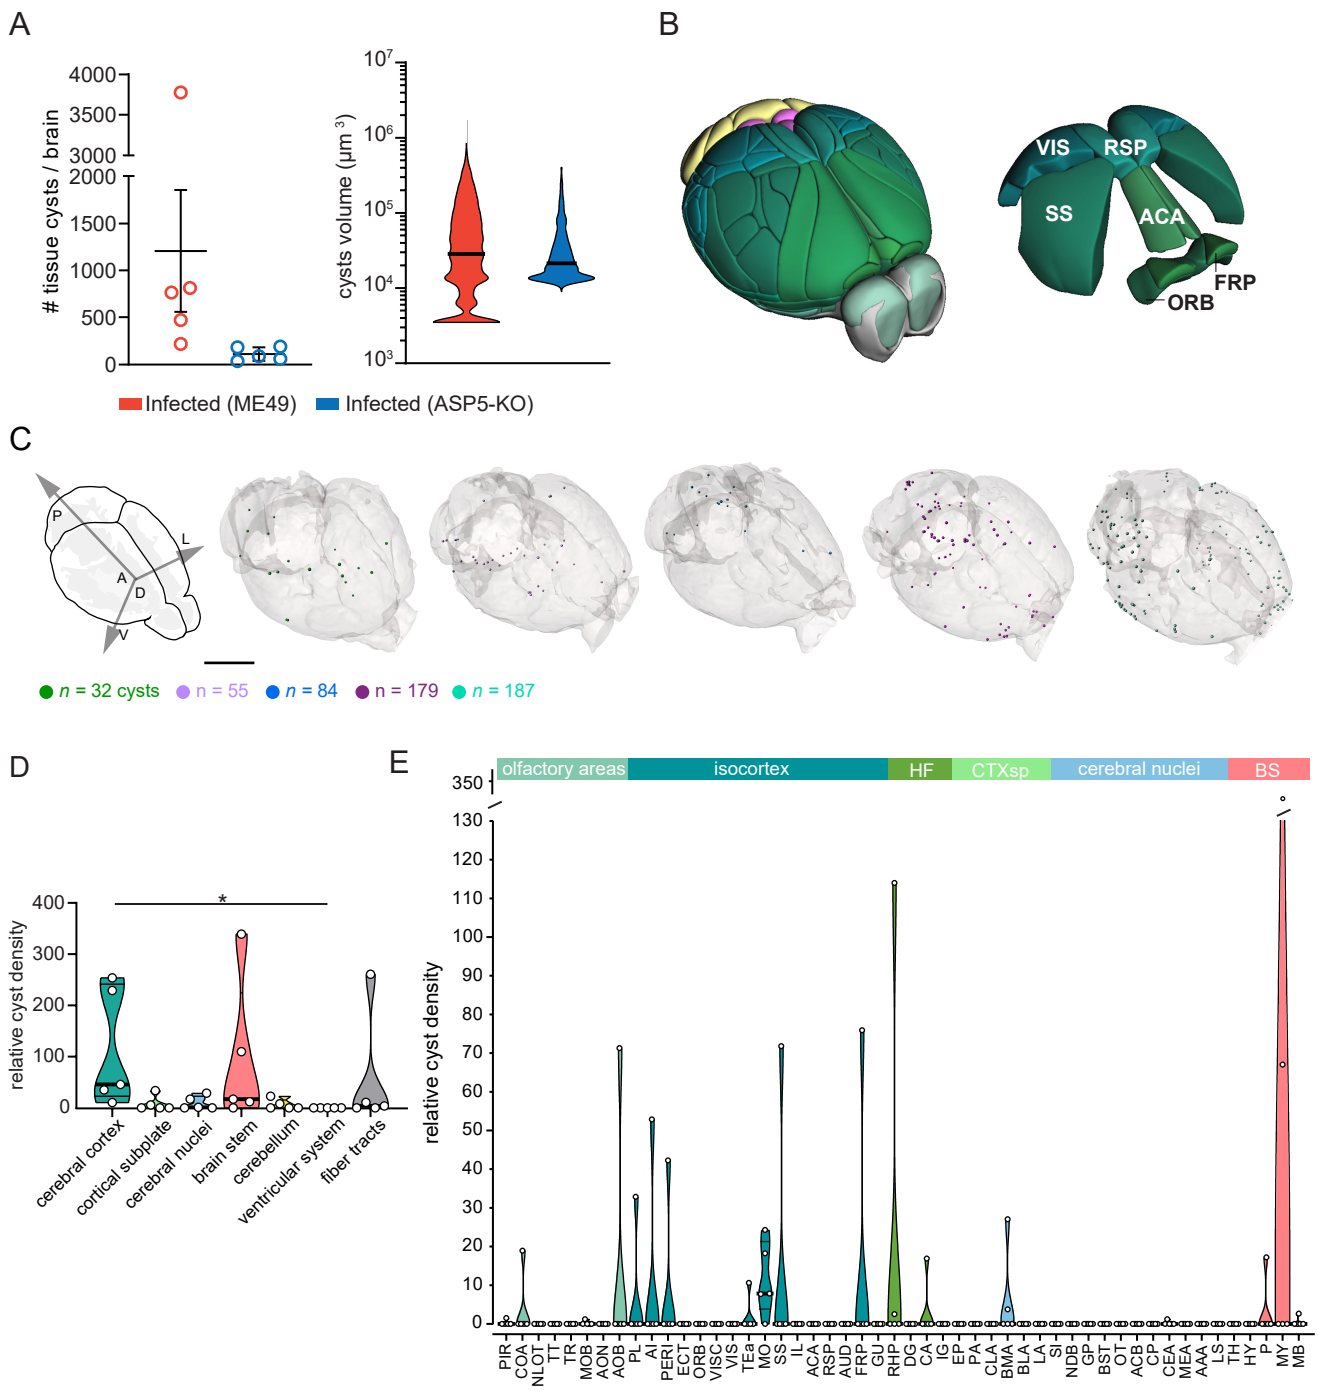

**Figure S6 – Cartography of *T. gondii* cysts in the mouse brain, Related to Figure 6**

(A) Cyst counts and volume obtained after segmentation, from all individuals infected with ME49-GFP or ASP5-KO-GFP.

(B) 3D illustration of subregions with highest relative density (percentage of cysts in a region / volume of the region ( $\text{mm}^3$ )) of cysts in ME49-infected mice.

(C) 3D rendering of CLARITY-processed brains showing colorized *T. gondii* ASP5-KO-GFP cysts. The size of the cysts was purposely made uniform. Scale bar, 5 mm.

(D) Relative cyst density (percentage of cysts in a region / volume of the region ( $\text{mm}^3$ )) in different regions of the brains of *T. gondii* ASP5-KO-GFP-infected mice.

(E) Distribution of the relative cyst density within subregions of the CNS in *T. gondii* ASP5-KO-GFP-infected mice. For abbreviations, see Table S4.

Bold bars indicate the median and thinner bars the quartiles. Each dot represents an individual.

## Supplementary Table 5, related to Figure 6

### Abbreviations of brain regions

|              |                                        |           |                          |
|--------------|----------------------------------------|-----------|--------------------------|
| <b>OLF</b>   | <b>olfactory areas</b>                 | MEA       | medial amygdalar nucleus |
| PIR          | piriform area                          | AAA       | anterior amygdalar area  |
| COA          | cortical amygdalar area                | LS        | lateral septal nucleus   |
| NLOT         | nucleus of the lateral olfactory tract | <b>BS</b> | <b>brain stem</b>        |
| TT           | taenia tecta                           | TH        | thalamus                 |
| TR           | postpiriform transition area           | HY        | hypothalamus             |
| MOB          | main olfactory bulb                    | P         | pons                     |
| AON          | anterior olfactory nucleus             | MY        | medulla                  |
| AOB          | accessory olfactory bulb               | MB        | midbrain                 |
| <b>ISO</b>   | <b>isocortex</b>                       |           |                          |
| PL           | prelimbic area                         |           |                          |
| AI           | agranular insular area                 |           |                          |
| PERI         | perirhinal area                        |           |                          |
| ECT          | ectorhinal area                        |           |                          |
| ORB          | orbital area                           |           |                          |
| VISC         | visceral area                          |           |                          |
| VIS          | visual areas                           |           |                          |
| TEa          | temporal association areas             |           |                          |
| MO           | motor areas                            |           |                          |
| SS           | somatosensory areas                    |           |                          |
| IL           | infralimbic areas                      |           |                          |
| ACA          | anterior cingulate area                |           |                          |
| RSP          | retrosplenial area                     |           |                          |
| AUD          | auditory areas                         |           |                          |
| FRP          | frontal pole, cerebral cortex          |           |                          |
| GU           | gustatory areas                        |           |                          |
| <b>HF</b>    | <b>hippocampal formation</b>           |           |                          |
| RHP          | retrohippocampal region                |           |                          |
| DG           | dentate gyrus                          |           |                          |
| CA           | ammon's horn                           |           |                          |
| IG           | induseum griseum                       |           |                          |
| <b>CTXsp</b> | <b>cortical subplate</b>               |           |                          |
| EP           | endopiriform nucleus                   |           |                          |
| PA           | posterior amygdalar nucleus            |           |                          |
| CLA          | claustrum                              |           |                          |
| BMA          | basomedial amygdalar nucleus           |           |                          |
| BLA          | basolateral amygdalar nucleus          |           |                          |
| LA           | lateral amygdalar nucleus              |           |                          |
| SI           | substantia innominata                  |           |                          |
| <b>CNU</b>   | <b>cerebral nuclei</b>                 |           |                          |
| NDB          | diagonal band nucleus                  |           |                          |
| GP           | globus pallidus                        |           |                          |
| BST          | bed nuclei of the stria terminalis     |           |                          |
| OT           | olfactory tuberle                      |           |                          |
| ACB          | nucleus accumbens                      |           |                          |
| CP           | caudoputamen                           |           |                          |
| CEA          | central amygdalar nucleus              |           |                          |
